# Supplementary material
Source: PubMed Central journal article supplement (PMC2490784)
Supplement: M800466200_1.pdf [file M800466200_1.pdf]

## **Supplemental figures and tables**

### **Supplemental Fig. 1. Negative-stain EM micrographs of CsgA, $\Delta R2$ , $\Delta R3$ and $\Delta R4$ fibers assembled *in vivo* at high magnification.**

Negative-stain EM micrographs of wild-type strain MC4100 and *csgA* mutant cells containing the indicated plasmids. Cells were grown on YESCA plates for 48 hrs at 26°C prior to staining with uranyl acetate. Scale bars are equal to 200 nm.

### **Supplemental Fig. 2. Negative-stain EM micrographs of *csgA* cells expressing CsgA, $\Delta R1$ or $\Delta R5$ for a long-term growth.**

Negative-stain EM micrographs of *csgA* mutant cells containing the indicated plasmids. Cells were grown on YESCA plates for 100 hrs at 26°C prior to staining with uranyl acetate. Scale bars are equal to 500 nm.

### **Supplemental Fig. 3. *In vitro* polymerization of CsgA mutant proteins under the quiescent condition.**

13  $\mu\text{M}$  CsgA (A) and  $\Delta R5$  at various concentrations (B) were incubated at room temperature without agitation in the presence of 0.02%  $\text{NaN}_3$ . At the indicated time points, samples were withdrawn, ThT was added at a concentration of 20  $\mu\text{M}$  and fluorescence was measured at 495 nm after excitation at 438 nm by a Spectramax M2 plate reader (Molecular Devices, Sunnyvale, CA). ThT fluorescence was normalized as described in the Materials and Methods.

Supplemental Fig. 1

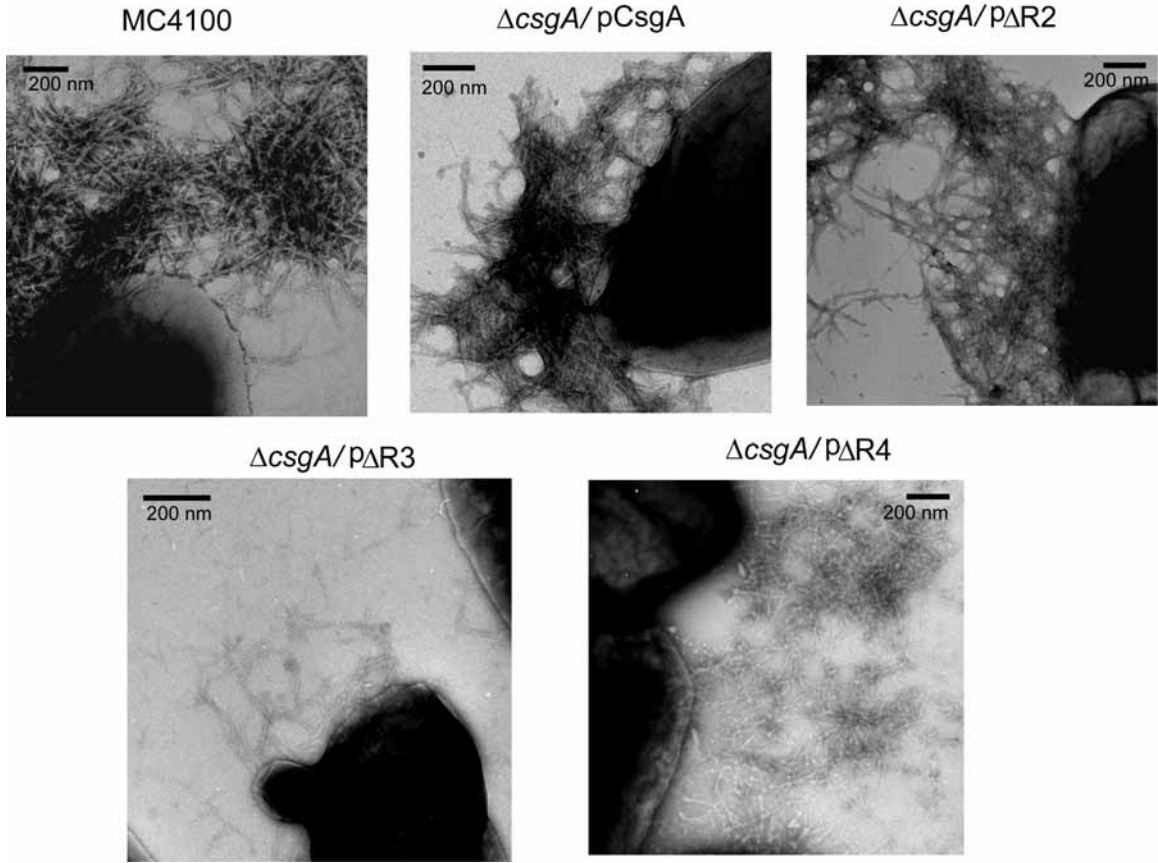

Supplemental Fig. 2

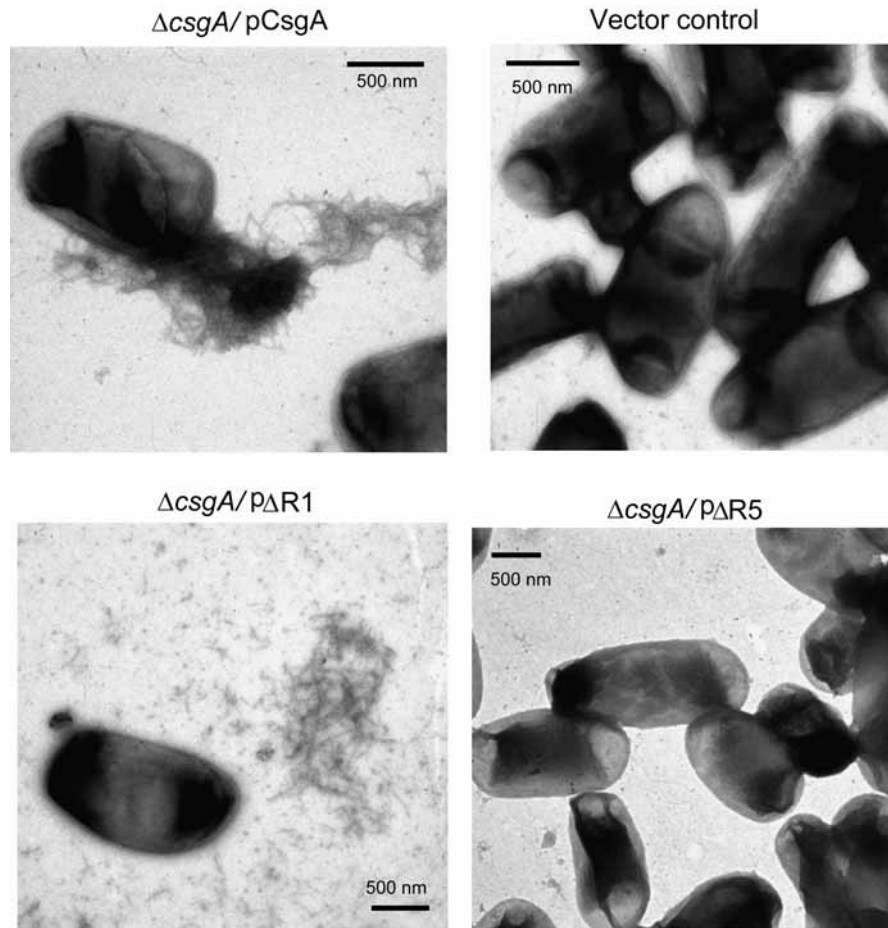

Supplemental Fig. 3

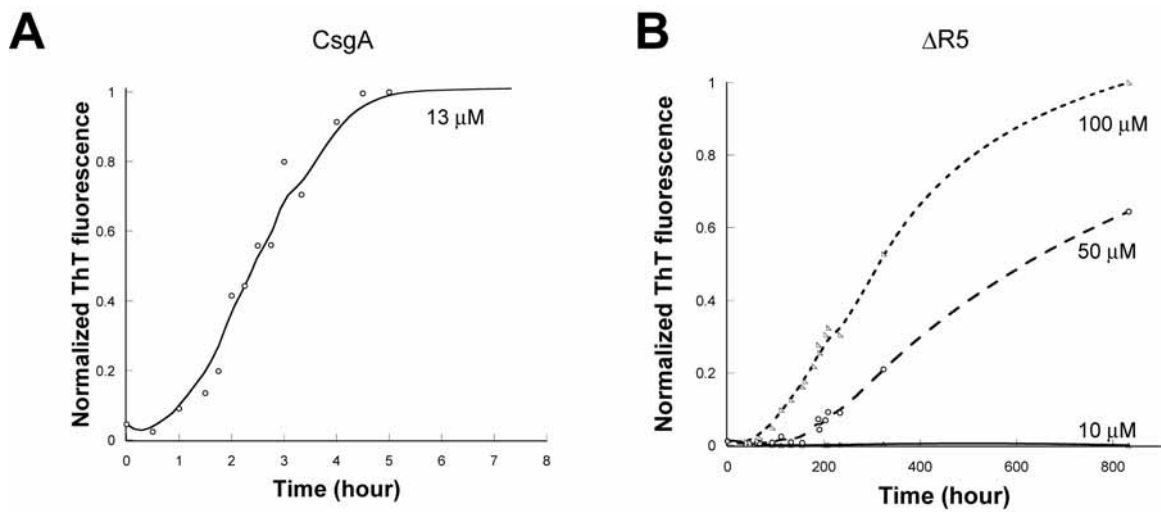

**Supplemental Table 1. Strains and plasmids used in this study<sup>a</sup>**

| <b>Strains or Plasmids</b> | <b>Relevant characteristics</b>                                        | <b>References</b>       | <b>Primer used</b>                   |
|----------------------------|------------------------------------------------------------------------|-------------------------|--------------------------------------|
| <b>Strains</b>             |                                                                        |                         |                                      |
| <i>csgA</i> (LSR10)        | MC4100 $\Delta$ <i>csgA</i>                                            | (Chapman et al., 2002)  |                                      |
| <i>csgBA</i> (LSR13)       | MC4100 $\Delta$ <i>csgBA</i>                                           | (Hammer et al., 2007)   |                                      |
| LSR12                      | C600 $\Delta$ <i>csgBA</i> and $\Delta$ <i>csgDEFG</i>                 | (Chapman et al., 2002)  |                                      |
| <b>Plasmids</b>            |                                                                        |                         |                                      |
| pCsgA (pLR5)               | <i>csgA</i> sequence in pLR2                                           | Hultgren lab            |                                      |
| pLR2                       | Control vector containing <i>csgBA</i> promoter                        | (Robinson et al., 2006) |                                      |
| p $\Delta$ R1              | <i>csgA</i> without R1 (S <sup>43</sup> to N <sup>65</sup> ) in pLR2   | This Study              | FpLR5, RpLR5, p $\Delta$ R1 P1, P2   |
| p $\Delta$ R2              | <i>csgA</i> without R2 (S <sup>66</sup> to D <sup>87</sup> ) in pLR2   | This study              | FpLR5, RpLR5, p $\Delta$ R2 P1, P2   |
| p $\Delta$ R3              | <i>csgA</i> without R3 (S <sup>88</sup> to N <sup>110</sup> ) in pLR2  | This study              | FpLR5, RpLR5, p $\Delta$ R3 P1, P2   |
| p $\Delta$ R4              | <i>csgA</i> without R4 (S <sup>111</sup> to N <sup>132</sup> ) in pLR2 | This study              | FpLR5, RpLR5, p $\Delta$ R4 P1, P2   |
| p $\Delta$ R5              | <i>csgA</i> without R5 (S <sup>133</sup> to Y <sup>151</sup> ) in pLR2 | This study              | FpLR5, p $\Delta$ R5 P1              |
| p $\Delta$ R1&5            | <i>csgA</i> without R1 and R5 in pLR2                                  | This study              | FpLR5, p $\Delta$ R5 P1 <sup>b</sup> |

<sup>a</sup> Vectors used for expression and purification are not listed. These vectors were constructed by insertion of PCR amplified mutant *csgA* sequences with C-terminal hexahistidine tag into NdeI/EcoR1 sites in pMC3 (Chapman et al., 2002) replacing sequence encoding CsgA-his.

<sup>b</sup> p $\Delta$ R1 was used as template for PCR to make p $\Delta$ R1&5.

1 **Supplemental Table 2. Sequence of primers used in this study**

| Primer Name          | Sequence                             |
|----------------------|--------------------------------------|
| FpLR5 <sup>a</sup>   | 5' CATGCCATGGCGAAACTTTTAAAAGTAGC 3'  |
| RpLR5 <sup>b</sup>   | 5' CGGGATCCTGTATTAGTACTGAT 3'        |
| pΔR1 P1 <sup>c</sup> | 5' AATAGTCAAGTCAGAATTTGGGCCGCTATT 3' |
| pΔR1 P2 <sup>d</sup> | 5' AATAGCGGCCCAAATTCTGACTTGACTATT 3' |
| pΔR2 P1              | 5' GATCGATTGAGCTGTTACGGGCATCA 3'     |
| pΔR2 P2              | 5' TGATGCCCGTAACAGCTCAATCGATC 3'     |
| pΔR3 P1              | 5' CCGTCATTTTCAGAGTCATCTGAGCCCT 3'   |
| pΔR3 P2              | 5' AGGGCTCAGATGACTCTGAAATGACGG 3'    |
| pΔR4 P1              | 5' CGTTGACGGAGGAATTTTGCCGTTTC 3'     |
| pΔR4 P2              | 5' GAACGGCAAAAATTCCTCCGTCAACG 3'     |
| pΔR5 P1              | 5' CGGGATCCTGTATTAGTTAGATGCAG 3'     |

2

3 <sup>a</sup> FpLR5 is paired to noncoding strand immediately upstream of the start codon of *csgA* in pLR5.

4 <sup>b</sup> RpLR5 is paired to coding strand immediately downstream of the stop codon of *csgA* in pLR5.

5 <sup>c</sup> The primers with odd number such as pΔR1 P1 are paired to the coding strand of *csgA* template.

6 <sup>d</sup> The primers with even number such as pΔR1 P2 are paired to the noncoding strand of *csgA*

7 template.

8

9 **Supplemental References:**

- 10 Chapman, M. R., Robinson, L. S., Pinkner, J. S., Roth, R., Heuser, J., Hammar, M., Normark, S.,  
 11 and Hultgren, S. J. (2002). Role of Escherichia coli curli operons in directing amyloid fiber  
 12 formation. *Science* **295**, 851-855.
- 13 Hammer, N. D., Schmidt, J. C., and Chapman, M. R. (2007). The curli nucleator protein, CsgB,  
 14 contains an amyloidogenic domain that directs CsgA polymerization. *Proc Natl Acad Sci U S*  
 15 *A.* **93**, 6562-6566
- 16 Robinson, L. S., Ashman, E. M., Hultgren, S. J., and Chapman, M. R. (2006). Secretion of curli  
 17 fibre subunits is mediated by the outer membrane-localized CsgG protein. *Mol Microbiol* **59**,  
 18 870-88
